# Supplementary material
Source: Research Square preprint supplement (doi:10.21203/rs.3.rs-8364324/v1)
Supplement: Supplementary file 1 [file 90daf777f4d1ec4b95cdd8ae.pdf]

## Supporting Information

### **Mechanistic Insights into UV/H<sub>2</sub>O<sub>2</sub>-Aged Polystyrene Enable an Optimized Protocol for Fungal Biodegradation**

Zhi Guo<sup>1,3,\*</sup>, Yuanyuan Zha<sup>1,3</sup>, Xingpan Guo<sup>2,\*</sup>, Xinlei Ling<sup>1,3</sup>, Lin Yao<sup>1,3</sup>, Lishou Han<sup>1,3</sup>, Fan Yang<sup>1,3</sup>

<sup>1</sup> School of Resources and Environmental Engineering, Hefei University of Technology, Hefei 230009, China

<sup>2</sup> State Key Laboratory of Estuarine and Coastal Research, East China Normal University, 500 Dongchuan Road, Shanghai 200241, China

<sup>3</sup> Anhui Ecological Civilization Research Institute, Hefei University of Technology, Hefei 230009, China

\* Corresponding author

E-mail address: guozhi@hfut.edu.cn (G.Z.); [xpguo@sklec.ecnu.edu.cn](mailto:xpguo@sklec.ecnu.edu.cn) (G.X.)

## Contents

### 1. Supporting Methods

Text S1. Medium composition.

Text S2. Assays of the physiological and enzyme activities of *P. chrysosporium*.

Text S3 Experimental methods for transcriptome.

Text S4. Plastics metabolic process analysis.

### 2. Supporting Figures

Figure S1. Experimental setup diagram.

Figure S2. The entire degradation process, Visualization of the pre-treatment and biodegradation of plastic films.

Figure S3. The plastic films fragmented into irregular pieces.

Figure S4. Expression Analysis

Figure S5. Venn diagram of CK versus P-PS, CK versus UV/H<sub>2</sub>O<sub>2</sub>-PS, P-PS versus UV/H<sub>2</sub>O<sub>2</sub>-PS experimental groups.

Figure S6. Volcanic map of of CK versus P-PS, CK versus UV/H<sub>2</sub>O<sub>2</sub>-PS, P-PS versus UV/H<sub>2</sub>O<sub>2</sub>-PS experimental groups

Figure S7. CK vs P-PS bubble diagram of GO enrichment analysis.

Figure S8. CK vs UV/H<sub>2</sub>O<sub>2</sub>-PS bubble diagram of GO enrichment analysis.

Figure S9. P-PS vs UV/H<sub>2</sub>O<sub>2</sub>-PS bubble diagram of GO enrichment analysis.

### 3. Supporting Tables

Table S1. GC-MS results of compounds released from polymer film by UV/H<sub>2</sub>O<sub>2</sub> pretreatment stage.

Table S2. GC-MS results of compounds released from polymer film by *P. chrysosporium*.

Table S3. Raw data.

Table S4. Genes relative to extracellular enzymes

Table S5. Genes relative to the enzymes involved in the degradation reactions

Table S6. Genes relative to endocytosis and vesicle transport

Table S7. Genes relative to Fatty acid degradation

Table S8. Genes relative to TCA cycle

### **Text S1. Medium composition.**

The Potato Dextrose Agar medium was prepared for strain propagation, and the main components of the medium (20g glucose, 3g  $\text{KH}_2\text{PO}_4$ , 1.5g  $\text{MgSO}_4 \cdot 7\text{H}_2\text{O}$  and 20g agar) were dissolved in 1000 ml of potato extract solution (cut potatoes into small pieces, add water to boil, and then filter with gauze to get the potato extract solution), adjust the pH of the culture solution to be weakly alkaline.

Carbon limited Potato Dextrose Agar medium was used for plastic degradation and a series of fungus experiments, (5g glucose, 3g  $\text{KH}_2\text{PO}_4$ , 1.5g  $\text{MgSO}_4 \cdot 7\text{H}_2\text{O}$  and 20g agar) were dissolved in 1000 ml of potato extract solution (Cut potatoes into small pieces, add water to boil, and then filter with gauze to get the potato extract solution), adjust the pH of the culture solution to be weakly alkaline.

## **Text S2. Assays of the physiological and enzyme activities of *P.***

### ***chrysosporium.***

The cultures and plastic films were collected during the biodegradation process. Fungal mycelia were harvested by filtration through a Buchner funnel equipped with a 0.22 µm membrane and subsequently dried in a vacuum oven at 105 °C for 24 h. The dry biomass weight was used to evaluate the colonization level of the fungus. After filtration from each Petri dish and repeated rinsing with ultrapure water (2–3 times), white-rot fungal mycelia with a fresh weight of 0.2 g were transferred into a 10 mL centrifuge tube. One milliliter of thiazole blue (MTT) solution (80 mg/L) was added to each tube, and the tubes were incubated in a water bath at 50 °C for 2 h. Then, 0.5 mL of hydrochloric acid solution (1 mol/L) was immediately added to terminate the reaction. The samples were centrifuged at 10,000 rpm for 5 min using a high-speed refrigerated centrifuge. After centrifugation, the supernatant was collected, mixed with 8 mL of isopropyl alcohol, and the absorbance at 534 nm was measured using a UV spectrophotometer after 2 h of shaking in the dark. The cellular activity of each sample was calculated as the ratio relative to the control group (without plastics). Weigh 0.3 g of bacterial cells (wet weight) into a 2-mL centrifuge tube. Add 1.5–1.7 mL of PBS buffer. Centrifuge at 12,000 rpm at 4°C for 10 minutes. Collect the supernatant and filter through a water-permeable membrane to obtain the crude enzyme solution.

MnP activity was determined as follows. First, 2.4 mL of succinic acid buffer (0.05 M, pH 4.5) and 0.1 mL of MnSO<sub>4</sub> (15 mM) were mixed thoroughly, and 0.4 mL of crude enzyme extract was then added. The reaction was initiated by adding 0.1 mL of H<sub>2</sub>O<sub>2</sub> (10 mM). The change in absorbance at 290 nm over 3 min was monitored. One unit (U) of MnP activity was defined as the amount of enzyme required to produce 1 µmol of Mn<sup>3+</sup> per minute at 37 °C and pH 4.5.

LiP activity was determined as follows. A total of 1.5 mL of tartaric acid buffer (0.1 M, pH 3.0) and 1.0 mL of veratryl alcohol solution (100 mM) were thoroughly mixed, followed by the addition of 0.4 mL of crude enzyme extract. The reaction was initiated by adding 0.1 mL of H<sub>2</sub>O<sub>2</sub> (10 mM). The change in absorbance at 310 nm over 3 min was recorded. One unit (U) of LiP activity was defined as the amount of enzyme required to produce 1 µmol of veratryl alcohol oxidation product per minute.

Lac activity was determined using ABTS as the substrate. A total of 2.0 mL of sodium citrate buffer (0.1 M, pH 5.0), 0.5 mL of ABTS solution (1 mM), and 0.5 mL of crude enzyme extract were mixed at 30 °C. The change in absorbance at 420 nm was immediately measured using a UV–visible spectrophotometer. One unit (U) of Lac activity was defined as the amount of enzyme required to convert 1 µmol of ABTS per minute.

## **Text S3 Experimental methods for transcriptome.**

### **1. RNA detection**

Total RNA was extracted, and residual DNA was removed using the RNA Kit (15NT) (Agilent, DNF-471-1000). RNA integrity was assessed using RNA-specific agarose gel electrophoresis or an Agilent 2100 Bioanalyzer with the RNA 6000 Nano Kit (Agilent, 5067-1511).

### **2. Library construction process**

Sequencing libraries were generated using the TruSeq RNA Sample Preparation Kit (Illumina, San Diego, CA, USA). Firstly, mRNA was purified from total RNA using poly-T oligo-attached magnetic beads. Fragmentation was carried out using divalent cations under elevated temperature in an Illumina proprietary fragmentation buffer. First strand cDNA was synthesized using random oligonucleotides and Super Script II. Second strand cDNA synthesis was subsequently performed using DNA Polymerase I and RNase H. Remaining overhangs were converted into blunt ends via exonuclease/polymerase activities and the enzymes were removed. After adenylation of the 3' ends of the DNA fragments, Illumina PE adapter oligonucleotides were ligated to prepare for hybridization. To select cDNA fragments of the preferred 400-500 bp in length, the library fragments were purified using the AMPure XP system (Beckman Coulter, Beverly, CA, USA). DNA fragments with ligated adaptor molecules on both ends were selectively enriched using Illumina PCR Primer Cocktail in a 15 cycle PCR reaction. Products were purified (AMPure XP system) and quantified using the Agilent high sensitivity DNA assay on a Bioanalyzer 2100 system (Agilent). The sequencing library was then sequenced on NovaSeq 6000 platform (Illumina) by Shanghai Personal Biotechnology Cp. Ltd.

Databases used for gene function annotation include NR, GO, KEGG, eggNOG, Swiss-Prot, Pfam.

### **3. Expression analysis**

Using transcriptome expression quantification software RSEM (v2.15), Clean Reads of each sample were compared to the reference sequence using the spliced unigene sequence as reference. Then the number of Reads from each sample to each gene was counted, and the FPKM value of each gene was calculated.

### **4. Differential gene analysis**

DESeq (v1.38.3) software was used to analyze the differential expression between the two comparison combinations. DESeq was used to analyze the difference of gene expression, and the conditions for screening the differentially expressed genes were: expression difference multiple  $|\log_2\text{FoldChange}| > 1$ , the significant P-value  $< 0.05$ .

### **5. Differential gene enrichment analysis**

TopGO (v2.50.0) was used for GO enrichment analysis, P-value was calculated by hypergeometric distribution method (the standard of significant enrichment was P-value  $< 0.05$ ), and GO term of significant enrichment of differential genes (all/up/down) was found, so as to determine the main biological functions of differential genes. The KEGG pathway enrichment analysis was performed using clusterProfiler (v4.6.0) software, focusing on significant enrichment pathways with P-value  $< 0.05$ .

#### **Text S4. Plastics metabolic process analysis.**

The biodegradation products were characterized via gas chromatography–mass spectrometry (GC–MS). First, the plastic film was removed from the Petri dish, 20 mL of deionized water was added, and the medium was stirred into a homogeneous slurry. The slurry was transferred to a 50 mL colorimetric tube, and the agitator was washed three times with 10 mL of deionized water. After the slurry was centrifuged at 3000 rpm for 10 minutes, the supernatant was transferred to 50 mL clear glass bottles. Then, 20 mL of dichloromethane ( $\text{CH}_2\text{Cl}_2$ ) was added to extract the organic phase and transferred into a 20 mL glass bottle.  $\text{CH}_2\text{Cl}_2$  was evaporated to a small volume under a nitrogen blower, and any remaining water was removed by adding 1 g of sodium sulfate ( $\text{Na}_2\text{SO}_4$ ). Finally, a sample size of 1 mL was transferred into brown glass bottles in preparation for GC–MS analysis.

**Figure S1. Experimental setup diagram.**

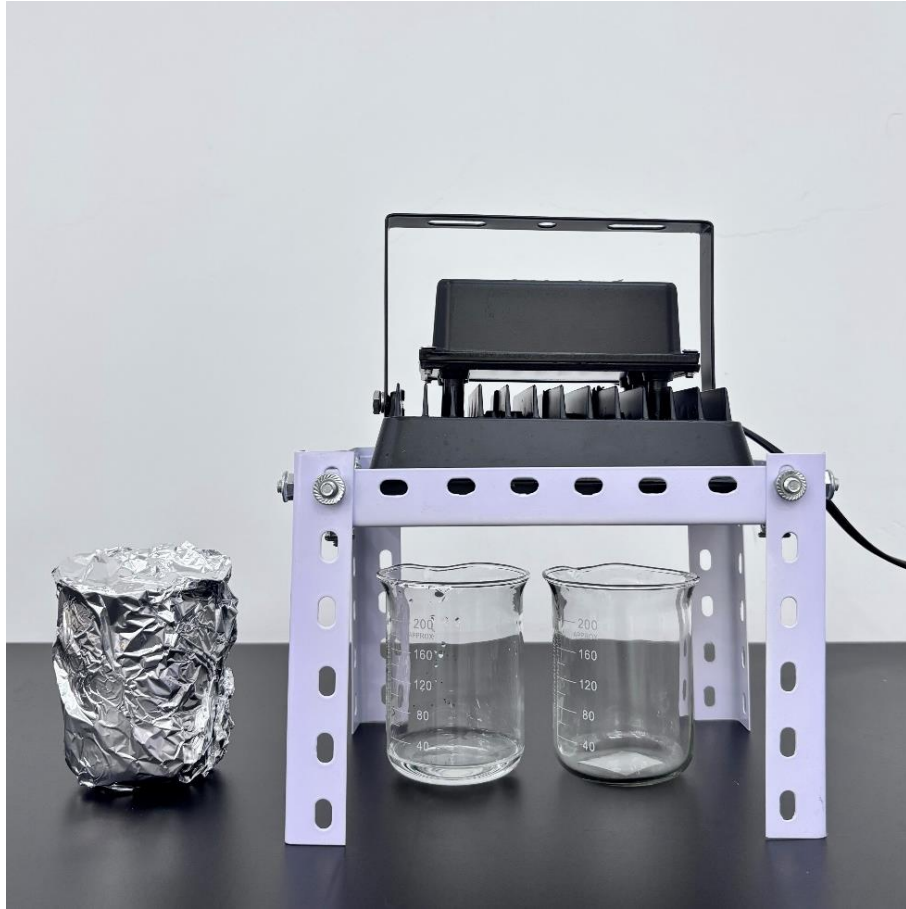

**Figure S2. The entire degradation process, Visualization of the pre-treatment and biodegradation of plastic films.**

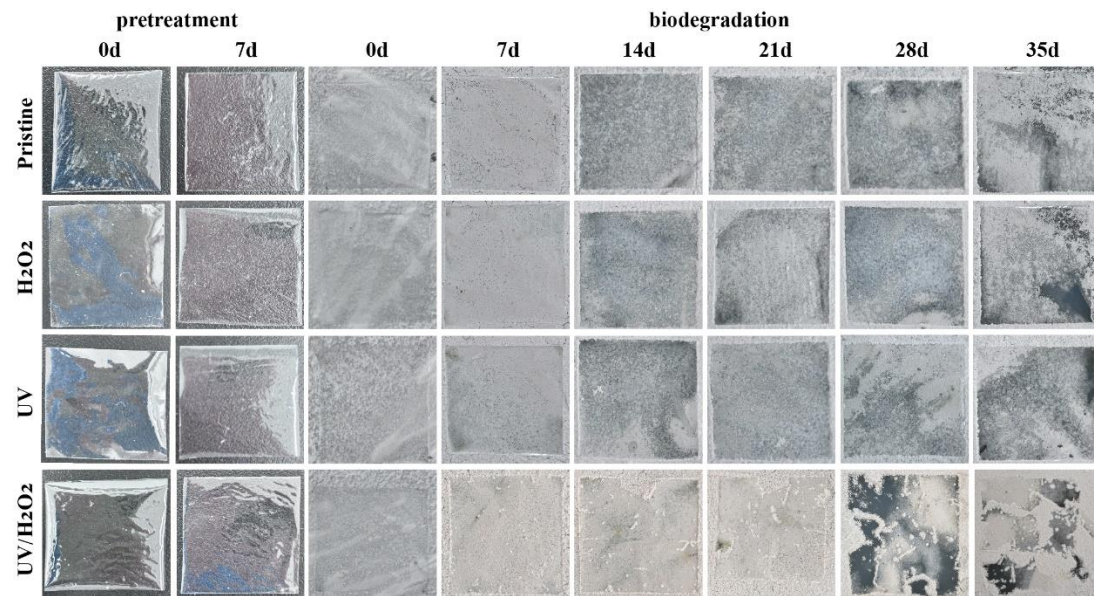

**Figure S3. The plastic films fragmented into irregular pieces.**

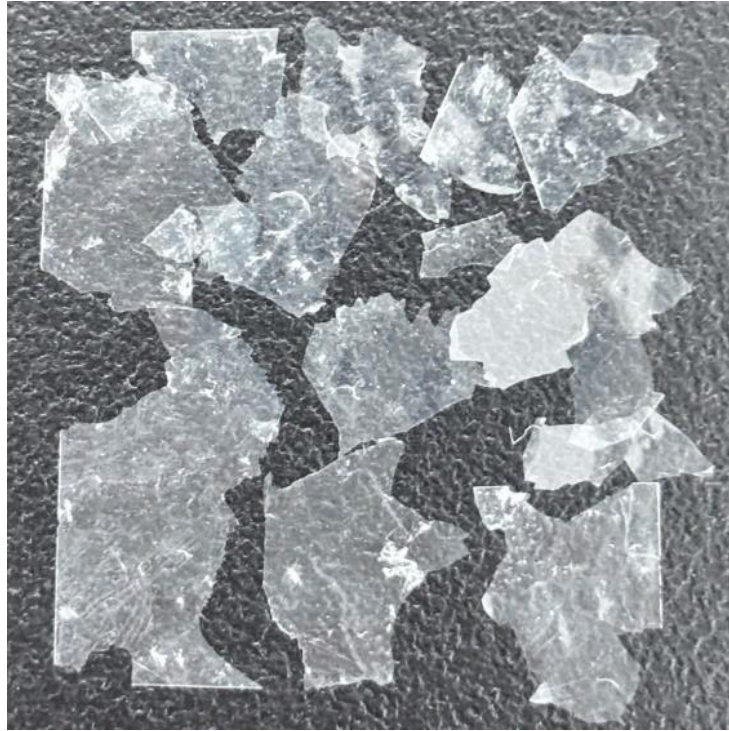

**Figure S4. Expression Analysis.**

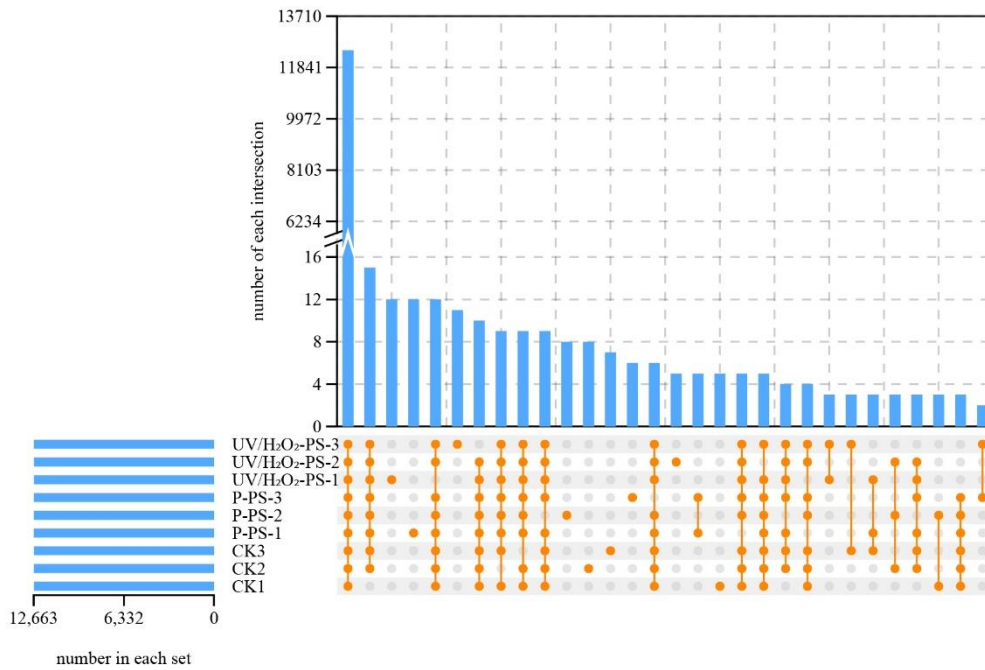

Number in each set refers to the total genes expressed in a sample.

Number of each intersection is the count of genes shared by the linked samples.

Connecting lines represent the number of overlapping genes, while individual points show the number of genes specific to that sample.

**Figure S5. Venn diagram of CK versus P-PS, CK versus UV/H<sub>2</sub>O<sub>2</sub>-PS, P-PS versus UV/H<sub>2</sub>O<sub>2</sub>-PS experimental groups.**

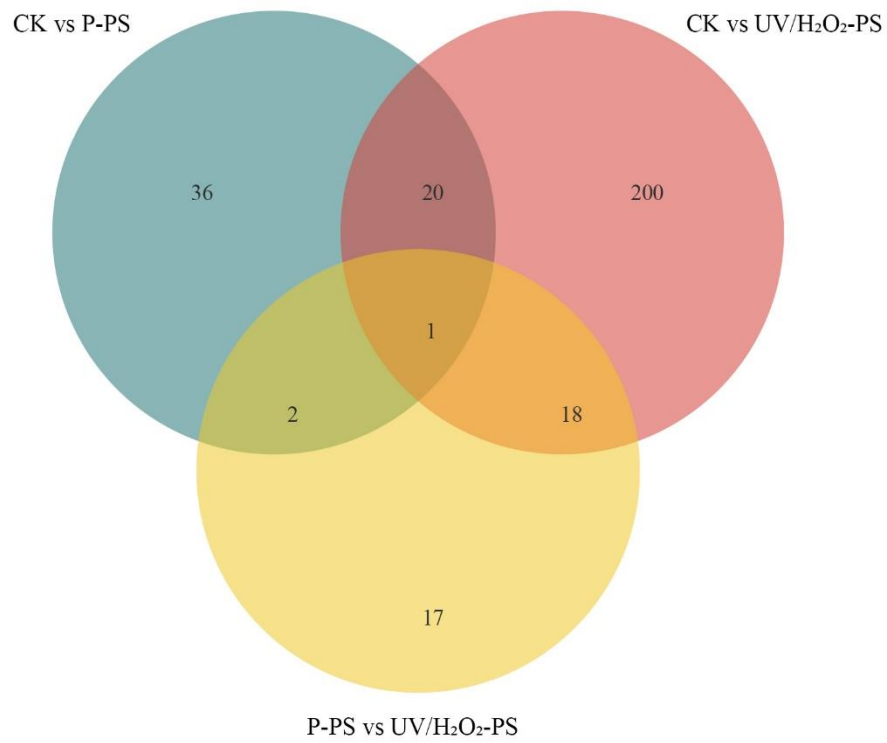

The sum of the numbers in each circle represents the total number of differential genes for that comparison set, and the overlapping part of the circle indicates the differential genes shared between the two comparison sets.

**Figure S6. Volcanic map of of CK versus P-PS, CK versus UV/H<sub>2</sub>O<sub>2</sub>-PS, P-PS versus UV/H<sub>2</sub>O<sub>2</sub>-PS experimental groups ( $p < 0.05$  and fold change  $\geq 1.5$ ;  $n = 3$ ).**

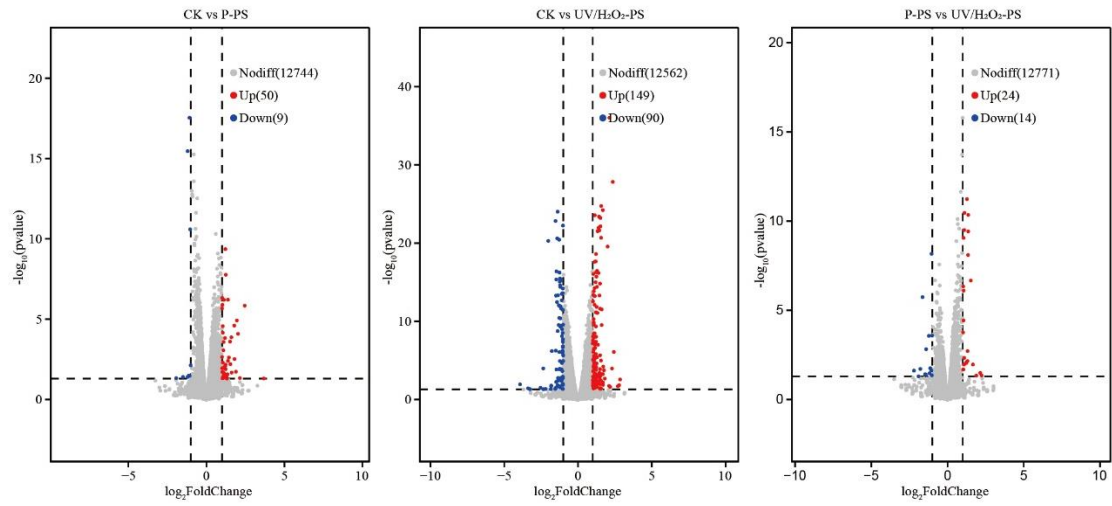

**Figure S7. CK vs P-PS bubble diagram of GO enrichment analysis.**

**analysis.**

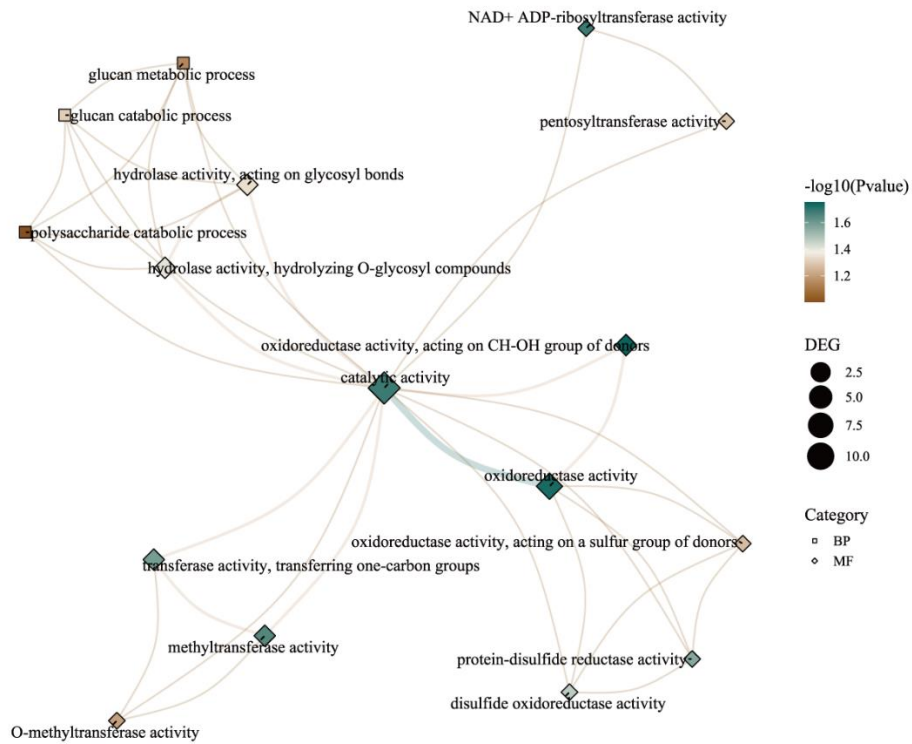

**Figure S8. CK vs UV/H<sub>2</sub>O<sub>2</sub>-PS bubble diagram of GO**

**enrichment analysis.**

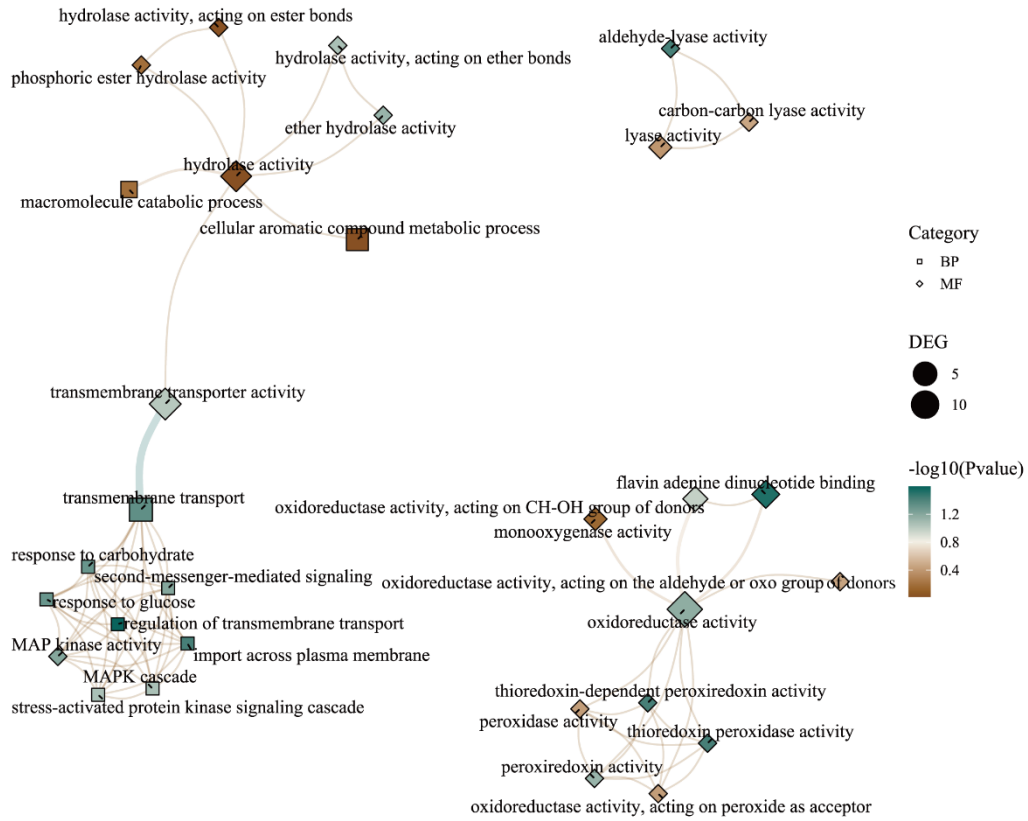

**Figure S9. P-PS vs UV/H<sub>2</sub>O<sub>2</sub>-PS bubble diagram of GO enrichment analysis.**

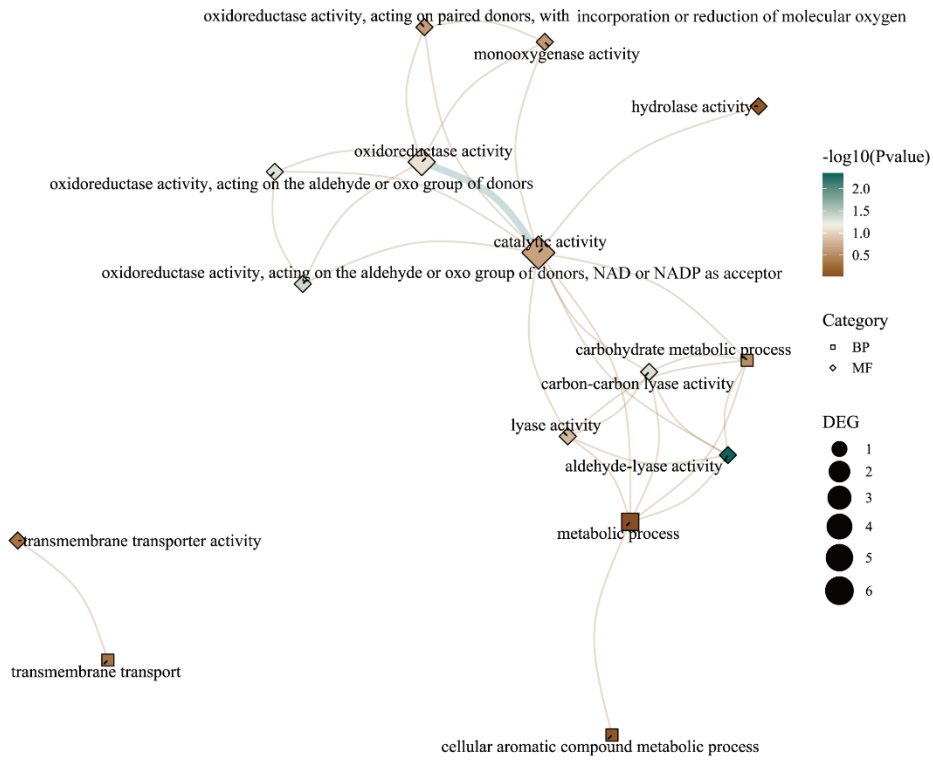

**Table S1. GC-MS results of compounds released from polymer film by UV/H<sub>2</sub>O<sub>2</sub> pretreatment stage.**

| No. | Chemical formula                    | Chemical formula                               | Structural formula | m/z (Relative intensity, %)             |
|-----|-------------------------------------|------------------------------------------------|--------------------|-----------------------------------------|
| 1   | 3-methyl-2-Butenal                  | C <sub>5</sub> H <sub>8</sub> O                |                    | 84(100),71(7),69(5),43(2),55(48)        |
| 2   | Acetic acid butyl ester             | C <sub>6</sub> H <sub>12</sub> O <sub>2</sub>  |                    | 43(100),57(41),56(25),41(26),47(25)     |
| 3   | 4,5-Dimethoxy-2-hydroxyacetophenone | C <sub>10</sub> H <sub>12</sub> O <sub>4</sub> |                    | 181(100),196(68),101(38),137(24),118(9) |
| 4   | 4,4'-Isopropylidenediphenol         | C <sub>15</sub> H <sub>16</sub> O <sub>2</sub> |                    | 239(100),26(82),228(66),24(9),214(50)   |
| 5   | 2-methyl-Benzaldehyde,              | C <sub>8</sub> H <sub>8</sub> O                |                    | 91(100),120(70),119(65),65(26),39(17)   |
| 6   | 2,2,4-trimethyl-Pentane             | C <sub>8</sub> H <sub>18</sub>                 |                    | 43(100),57(40),56(26),41(26),47(25)     |
| 7   | 1,2,4-Benzenetricarboxylic acid     | C <sub>11</sub> H <sub>10</sub> O <sub>6</sub> |                    | 207(100),43(37),125(21),118(10),239(9)  |
| 8   | 2,4-Di-t-butylphenol                | C <sub>14</sub> H <sub>22</sub> O              |                    | 191(100),57(28),192(18),163(16),206(15) |

**Table S2.GC-MS results of compounds released from polymer**

**film by *P. chrysosporium*.**

| No. | Chemical formula               | Chemical formula                               | Structural formula | m/z (Relative intensity, %)             |
|-----|--------------------------------|------------------------------------------------|--------------------|-----------------------------------------|
| 1   | 2-ethyl-1-butano               | C <sub>6</sub> H <sub>14</sub> O               |                    | 71(100),43(61),55(51),70(46),85(43)     |
| 2   | (E)-3-methyl-non-3-ene         | C <sub>10</sub> H <sub>20</sub>                |                    | 70(100),56(89),55(82),69(75),83(58)     |
| 3   | 3,5-dimethyloctane             | C <sub>10</sub> H <sub>22</sub>                |                    | 57(100), 71(91), 43(22),99(21), 84(15)  |
| 4   | Decane                         | C <sub>10</sub> H <sub>22</sub>                |                    | 57(100),43(80), 41(64), 71(44), 85(29)  |
| 5   | 2-isopropyl-5-methylhexan-1-ol | C <sub>10</sub> H <sub>22</sub> O              |                    | 71(100),57(99),43(92),55(68),56(63)     |
| 6   | 3-methylundecane               | C <sub>12</sub> H <sub>26</sub>                |                    | 57(100),85(81),71(70), 43(48), 99(18)   |
| 7   | 6-ethyl-2-methyldecane         | C <sub>13</sub> H <sub>28</sub>                |                    | 57(100), 43(76), 71(43), 85(26) 41(30)  |
| 8   | dodecane,4,6-dimethyl          | C <sub>14</sub> H <sub>30</sub>                |                    | 57(100), 71(90), 43(47), 85(28),70(20)  |
| 9   | 4-nonanone                     | C <sub>9</sub> H <sub>18</sub> O               |                    | 43(100),71(60),41(19),99(34),58(34)     |
| 10  | cis-7-Hexadecenoic acid        | C <sub>16</sub> H <sub>30</sub> O <sub>2</sub> |                    | 55(100), 41(62), 43(45), 69(44), 83(39) |
| 11  | 2-methyl-2-phenyloxirane       | C <sub>9</sub> H <sub>10</sub> O               |                    | 105(100),77(44),103(36), 78(33), 79(31) |
| 12  | Phenol                         | C <sub>6</sub> H <sub>6</sub> O                |                    | 94(100),66(25),65(22),63(10),95(8)      |
| 13  | m-Tolualdehyde                 | C <sub>8</sub> H <sub>8</sub> O                |                    | 91(100),120(89),119(89),65(27),63(20)   |
| 14  | 3,4-Dimethylbenzaldehyde       | C <sub>9</sub> H <sub>10</sub> O               |                    | 133(100),134(88),105(56),77(24),103(14) |
| 15  | 4-Methoxystyrene               | C <sub>9</sub> H <sub>10</sub> O               |                    | 134(100),119(54),91(41),133(31),65(23)  |
| 16  | 4-Isopropenylphenol            | C <sub>9</sub> H <sub>10</sub> O               |                    | 134(100),119(74),65(27),133(26),85(25)  |

|    |                                              |                   |                                                                                    |                                             |
|----|----------------------------------------------|-------------------|------------------------------------------------------------------------------------|---------------------------------------------|
| 17 | 4-Pentylphenol                               | $C_{11}H_{16}O$   | 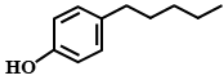 | 107(100),203(30),12(10),16<br>4(11),354(15) |
| 18 | hexoxybenzene                                | $C_{12}H_{18}O$   |  | 94(100),178(94),19(49),<br>23(44)           |
| 19 | Benzeneacetic<br>acid, 2-tetradecyl<br>ester | $C_{22}H_{36}O_2$ |  | 57(100), 91(86), 43(83),<br>71(62),41(54)   |
| 20 | 4-Propylbiphenyl-<br>4-Carboxylic Acid       | $C_{16}H_{16}O_2$ |  | 211(100),132(89),240(60),2<br>86(42)        |

---

**Table S3. Raw data.**

| Sample                                 | Reads No. | Raw Bases(bp) | Q30(bp)    | GC(%) | N(%)     | Q20(%) | Q30(%) |
|----------------------------------------|-----------|---------------|------------|-------|----------|--------|--------|
| CK1                                    | 42653460  | 6440672460    | 6155557622 | 58.82 | 0.004292 | 98.93  | 95.57  |
| CK2                                    | 40414154  | 6102537254    | 5830481077 | 58.94 | 0.004286 | 98.91  | 95.54  |
| CK3                                    | 39683980  | 5992280980    | 5726999290 | 58.92 | 0.004307 | 98.92  | 95.57  |
| PS-1                                   | 43349160  | 6545723160    | 6259428204 | 59.03 | 0.004329 | 98.96  | 95.63  |
| PS-2                                   | 45168050  | 6820375550    | 6510263201 | 58.96 | 0.004342 | 98.89  | 95.45  |
| PS-3                                   | 41915706  | 6329271606    | 6039601937 | 58.99 | 0.004320 | 98.87  | 95.42  |
| UV/H <sub>2</sub> O <sub>2</sub> -PS-1 | 39393218  | 5948375918    | 5681483157 | 58.99 | 0.004283 | 98.93  | 95.51  |
| UV/H <sub>2</sub> O <sub>2</sub> -PS-2 | 38826184  | 5862753784    | 5609165451 | 58.86 | 0.004337 | 98.98  | 95.67  |
| UV/H <sub>2</sub> O <sub>2</sub> -PS-3 | 40224384  | 6073881984    | 5805857680 | 58.94 | 0.004307 | 98.94  | 95.59  |

After the sample is sequenced on the computer, the image file is obtained, which is converted by the built-in software of the sequencing platform to generate the Raw Data of FASTQ, that is, the data off the computer. The Raw Data for each sample were counted separately, including sample name, Q30, percentage of fuzzy bases, and Q20(%) and Q30(%)

CK: *P. chrysosporium* Control group;

P-PS: *P. chrysosporium* incubation with P-PS;

UV/H<sub>2</sub>O<sub>2</sub>-PS: *P. chrysosporium* incubation with UV/ H<sub>2</sub>O<sub>2</sub>-PS;

Reads No.: Reads number;

Bases(bp): Base number;

Q30 (bp): Base recognition accuracy of more than 99.9% of the total number of bases;

N (%): Percentage of fuzzy bases;

Q20(%): The percentage of bases whose base recognition accuracy is above 99%;

Q30(%): The percentage of bases whose base recognition accuracy is above 99.9%.

**Table S4. Genes relative to extracellular enzymes**

| Gene ID     | Gene name | Genes description                                   | Fold change for P-PS | Fold change for UV/H <sub>2</sub> O <sub>2</sub> -PS |
|-------------|-----------|-----------------------------------------------------|----------------------|------------------------------------------------------|
| AGR57_14195 | LPOA      | AAD46494.1 lignin peroxidase                        | 1.1426               | 1.2475                                               |
| AGR57_7704  | -         | AAA33745.1 manganese peroxidase isozyme 2 precursor | 1.2576               | 1.2815                                               |
| AGR57_13022 | MNP1      | PEM1_PHACH Manganese peroxidase 1 OS                | 1.6249               | 1.4297                                               |
| AGR57_8985  | LAC1      | AAS21669.1 multicopper oxidase 4A                   | 1.0105               | 1.0607                                               |
| AGR57_8978  | fetC      | AAO42609.1 extracellular multicopper oxidase        | 1.0295               | 1.2048                                               |
| AGR57_14174 | GLG5      | LIG5_PHACH Ligninase LG5 OS                         | 1.0316               | 1.2504                                               |
| AGR57_14158 | GLG2      | LIG2_PHACH Ligninase LG2 OS                         | 1.3959               | 1.2346                                               |
| AGR57_1292  | -         | AAB39652.1 manganese peroxidase isozyme 3           | 1.2339               | 1.3276                                               |
| AGR57_13026 | MNP1      | Q02567.1 RecName: Full=Manganese peroxidase 1       | 1.2604               | 1.1953                                               |
| AGR57_8975  | LAC2      | AAS21662.1 multicopper oxidase 3B                   | 0.988                | 1.0451                                               |

**Table S5. Genes relative to the enzymes involved in the degradation reactions**

| Gene ID     | Gene name  | Genes description                                                    | Fold change for P-PS | Fold change for UV/H <sub>2</sub> O <sub>2</sub> -PS |
|-------------|------------|----------------------------------------------------------------------|----------------------|------------------------------------------------------|
| AGR57_10309 | YUC5       | GJE89306.1 Flavin-containing monooxygenase                           | 2.0689               | 1.5696                                               |
| AGR57_11744 | FCK2       | AAX81444.1 high nitrogen upregulated cytochrome P450 monooxygenase 2 | 1.76                 | 1.2678                                               |
| AGR57_1127  | ple1       | BAL05169.1 cytochrome P450                                           | 1.6706               | 1.9773                                               |
| AGR57_2648  | CYP074     | BAL05172.1 cytochrome P450                                           | 1.5811               | 1.7372                                               |
| AGR57_2386  | CYP075     | AAL67905.1 cytochrome P450 monooxygenase                             | 1.5293               | 1.8409                                               |
| AGR57_15504 | CYP091     | BAL05087.1 cytochrome P450                                           | 0.8886               | 4.5968                                               |
| AGR57_14986 | CYP075     | BAL05190.1 cytochrome P450                                           | 1.1877               | 2.3419                                               |
| AGR57_6451  | CYP067     | BAL05193.1 cytochrome P450                                           | 1.2288               | 1.9929                                               |
| AGR57_8204  | CYP091     | BAL05087.1 cytochrome P450                                           | 1.5291               | 1.9061                                               |
| AGR57_11759 | -          | GJE89571.1 catechol 1,2-dioxygenase                                  | 1.4109               | 1.6155                                               |
| AGR57_333   | ipdC       | GJE86950.1 2-nitropropane dioxygenase                                | 0.9244               | 1.5083                                               |
| AGR57_12967 | oryG       | GJE90676.1 TauD/TfdA family taurine catabolism dioxygenase           | -                    | 1.4664                                               |
| AGR57_1091  | -          | GJE97923.1 aromatic compound dioxygenase                             | 1.127                | 1.4282                                               |
| AGR57_7451  | tcpC       | TCPC_CUPPJ 6-chlorohydroxyquinol 1,2-dioxygenase                     | 1.1115               | 1.4189                                               |
| AGR57_13921 | adh        | ADH2_GEOSE Alcohol dehydrogenase                                     | 2.6046               | 2.0721                                               |
| AGR57_8919  | aldA       | GJE91571.1 aldehyde dehydrogenase                                    | 1.0411               | 1.3347                                               |
| AGR57_10940 | ALDH3A1    | GJE86460.1 aldehyde dehydrogenase family protein                     | 1.1726               | 1.1749                                               |
| AGR57_7611  | SPCC417.12 | GJE85461.1 carboxylesterase                                          | 1.0317               | 1.1178                                               |
| AGR57_7162  | hmgA       | GJE85537.1 homogentisate 1,2-dioxygenase                             | 1.2454               | 1.1681                                               |

**Table S6. Genes relative to endocytosis and vesicle transport**

| Gene ID     | Gene name   | Genes description                                      | Fold change for P-PS | Fold change for UV/H <sub>2</sub> O <sub>2</sub> -PS |
|-------------|-------------|--------------------------------------------------------|----------------------|------------------------------------------------------|
| AGR57_12966 | ARF         | GJE96028.1 ADP-ribosylation factor-like protein        | 1.1754               | 1.6906                                               |
| AGR57_3253  | SPAC664.02c | GJE93211.1 actin-like ATPase domain-containing protein | 1.0856               | 1.379                                                |
| AGR57_12089 | end4        | SLA2_SCHPO Endocytosis protein end4                    | 1.0113               | 1.0526                                               |
| AGR57_4999  | fcyB        | GJE93171.1 NCS cytosine-purine permease                | 1.5475               | 2.7469                                               |
| AGR57_359   | Sft2d2      | SFT2B_MOUSE Vesicle transport protein                  | 1.2084               | 1.6164                                               |
| AGR57_10246 | vti1        | GJE89440.1 vesicle transport v-snare protein vti1      | 0.9786               | 1.1473                                               |

**Table S7. Genes relative to Fatty acid degradation**

| Gene ID     | Gene name | Genes description                                           | Fold change for P-PS | Fold change for UV/H <sub>2</sub> O <sub>2</sub> -PS |
|-------------|-----------|-------------------------------------------------------------|----------------------|------------------------------------------------------|
| AGR57_9721  | lcf1      | GJE98644.1 long-chain acyl-CoA synthetase                   | 0.8875               | 1.0055                                               |
| AGR57_13921 | adh       | ADH2_GEOSE Alcohol dehydrogenase                            | 2.6046               | 2.0721                                               |
| AGR57_12373 | DLD       | DLD_ARATH D-lactate dehydrogenase<br>[cytochrome]           | 1.562                | 2.1942                                               |
| AGR57_552   | meh       | MEH_CHLAA Mesoconyl-C(4)-CoA<br>hydratase                   | 1.9882               | 2.1487                                               |
| AGR57_14850 | ACX1.2    | GJE95425.1 acyl-CoA dehydrogenase NM<br>domain-like protein | 1.2619               | 1.6763                                               |
| AGR57_4649  | hbd       | GJE94649.1 3-hydroxyacyl-CoA<br>dehydrogenase               | 0.9349               | 0.8434                                               |

**Table S8. Genes relative to TCA cycle.**

| Gene ID     | Gene name | Genes description                                              | Fold change for P-PS | Fold change for UV/H <sub>2</sub> O <sub>2</sub> -PS |
|-------------|-----------|----------------------------------------------------------------|----------------------|------------------------------------------------------|
| AGR57_2417  | PDB1      | GJE84218.1 pyruvate dehydrogenase E1<br>component subunit beta | 0.9864               | 1.1173                                               |
| AGR57_9184  | MDH1      | GJE92943.1 NAD-malate dehydrogenase                            | 1.0001               | 1.1153                                               |
| AGR57_13252 | gltA      | CISYC_DICDI Citrate synthase                                   | 1.1296               | 1.3497                                               |
| AGR57_7437  | CNBA4490  | GJE94825.1 succinate dehydrogenase<br>assembly factor 2        | 1.1043               | 1.1235                                               |
| AGR57_3454  | pyc       | GJE91041.1 pyruvate carboxylase                                | 0.9825               | 1.0644                                               |
| AGR57_12144 | aco2      | GJE85971.1 aconitate hydratase                                 | 1.0956               | 1.1648                                               |
| AGR57_5052  | icdA      | IDHP_ASPNG Isocitrate dehydrogenase<br>[NADP]                  | 0.9792               | 0.9947                                               |
